# Supplementary material for: Relationship between Nest and Body Temperature and Microclimate in the Paper Wasp Polistes dominula
Source: MDPI journal article supplement (doi:10.3390/insects14110886), 2023-11-16
Supplement: s1 [file s1]

Supplementary information

# Relationship between Nest and Body Temperature and Microclimate in the Paper Wasp *Polistes dominula*

Helmut Kovac \*, Julia Magdalena Nagy, Helmut Käfer and Anton Stabentheiner \*

Institute of Biology, University of Graz, 8010 Graz, Austria

\* Correspondence: helmut.kovac@uni-graz.at (H.K.); anton.stabentheiner@uni-graz.at (A.S.)

**Table S1.** Statistics for temperature measurements in inhabited and abandoned nests of *Polistes dominula* in Gschwendt (Austria) in the years 2017 and 2018.

| Location   | Date (d m y)   | Nest | N <sub>cells</sub> | N <sub>wasps</sub> | Eggs | Larvae | Pupae | Nest   | N <sub>cells</sub> |
|------------|----------------|------|--------------------|--------------------|------|--------|-------|--------|--------------------|
| inhabited  |                |      | abandoned          |                    |      |        |       |        |                    |
| Car tyre   | 28 June 2017   | N5   | 205                | 14                 | ✓    | ✓      | ✓     |        |                    |
| Loft barn  | 1-2 July 2017  | N1   | 70                 | 5                  | ✓    | ✓      | ✓     | N1 ab. | 36                 |
| Loft barn  | 5-6 July 2017  | N2   | 61                 | 8                  | ✓    | ✓      | ✓     | N2 ab. | 44                 |
| Loft barn  | 7 July 2017    | N3   | 120                | 15                 | ✓    | ✓      | ✓     | N3 ab. | 35                 |
| Loft house | 9 July 2017    | N6   | 77                 | 6                  | ✓    | ✓      | ✓     |        |                    |
| Car tyre   | 12 July 2017   | N4   | 119                | 13                 | ✓    | ✓      | ✓     |        |                    |
| Loft barn  | 16-17 Aug 2017 | N2   | 98                 | 7                  | ✓    | ✓      | ✓     |        |                    |
| Loft barn  | 21-23 Aug 2017 | N2   | 98                 | 8                  | ✓    | ✓      | ✓     | N2 ab. | 44                 |
| Loft barn  | 29-30 May 2018 | N4   | 33                 | 1                  | ✓    | ✓      | ✓     | N4 ab. | 48                 |
| Loft barn  | 30-31 May 2018 | N3   | 30                 | 1                  | ✓    | ✓      | ✓     | N3 ab. | 85                 |
| Loft barn  | 1-2 June 2018  | N2   | 19                 | 2                  | ✓    | ✓      | ✓     | N2 ab. | 80                 |
| Loft house | 3-5 June 2018  | N1   | 70                 | 4                  | ✓    | ✓      | ✓     | N1 ab. | 101                |

**Table S2.** Statistics, fit functions and parameters for temperature measurements in inhabited and abandoned nests of *Polistes dominula* in Gschwendt (Austria) in the years 2017 and 2018.

| Figure   | Subject                     | Function                                        | Parameter |          |          |             | R <sup>2</sup> | P       | N    |
|----------|-----------------------------|-------------------------------------------------|-----------|----------|----------|-------------|----------------|---------|------|
|          |                             |                                                 | A         | B        | C        | D           |                |         |      |
| Fig. 3a  | T <sub>comb</sub> inhabited | $y = A + B \cdot x + C \cdot x^2 + D \cdot x^3$ | 9.05105   | -0.51354 | 0.07808  | -0.00116    | 0.98363        | <0.0001 | 1715 |
|          | T <sub>comb</sub> abandoned | $y = a + b \cdot x$                             | -2.45437  | 1.14645  |          |             | 0.97405        | <0.0001 | 1363 |
| Fig. 3b  | T <sub>thorax</sub>         | $y = A + B \cdot x + C \cdot x^2 + D \cdot x^3$ | 5.49294   | 0.06197  | 0.04998  | -7.40234E-4 | 0.98148        | <0.0001 | 1647 |
| Fig. 4a  | spring                      | $y = A + B \cdot x + C \cdot x^2 + D \cdot x^3$ | 6.43007   | -0.02536 | 0.05187  | -7.4764E-4  | 0.98682        | <0.0001 | 685  |
|          | summer                      | $y = A + B \cdot x + C \cdot x^2 + D \cdot x^3$ | 8.81949   | -0.55165 | 0.08221  | -0.00124    | 0.9827         | <0.0001 | 1031 |
| Fig. 4b  | spring                      | $y = A + B \cdot x + C \cdot x^2 + D \cdot x^3$ | 14.15161  | -0.89171 | 0.08333  | -0.00112    | 0.98132        | <0.0001 | 616  |
|          | summer                      | $y = A + B \cdot x + C \cdot x^2 + D \cdot x^3$ | 4.81327   | 0.10109  | 0.05005  | -7.56456E-4 | 0.98457        | <0.0001 | 1031 |
| Fig. 5a  | comb                        | $y = a + b \cdot x$                             | 8.49258   | 1.05446  |          |             | 0.90342        | <0.0001 | 1502 |
| Fig. 5b  | thorax                      | $y = a + b \cdot x$                             | 8.36391   | 1.05546  |          |             | 0.90469        | <0.0001 | 1435 |
| Fig. 5c  | air                         | $y = a + b \cdot x$                             | 8.30261   | 1.05339  |          |             | 0.89199        | <0.0001 | 1502 |
| Fig. 5d  | comb                        | $y = a \cdot b^x$                               | 8.3212    | 1.0547   |          |             | 0.64273        | <0.0001 | 1715 |
| Fig. 5e  | thorax                      | $y = a \cdot b^x$                               | 8.1602    | 1.05578  |          |             | 0.65873        | <0.0001 | 1647 |
| Fig. 5f  | air                         | $y = a \cdot b^x$                               | 8.18374   | 1.05319  |          |             | 0.63651        | <0.0001 | 1715 |
| Fig. 6a  | comb                        | $y = A + B \cdot x + C \cdot x^2 + D \cdot x^3$ | 1.45637   | 1.05897  | -0.00398 | -3.46013E-5 | 0.9629         | <0.0001 | 1715 |
| Fig. 6b  | thorax                      | $y = A + B \cdot x + C \cdot x^2 + D \cdot x^3$ | 0.37233   | 1.26017  | -0.01395 | 1.07677E-4  | 0.96026        | <0.0001 | 1647 |
| Fig. 6c  | air                         | $y = A + B \cdot x + C \cdot x^2 + D \cdot x^3$ | -0.49319  | 1.45932  | -0.02732 | 2.93958E-4  | 0.94532        | <0.0001 | 1715 |
| Fig. 7a  | <i>P. dominula</i>          |                                                 |           |          |          |             |                |         |      |
|          | T <sub>comb</sub> inhabited | $y = A + B \cdot x + C \cdot x^2 + D \cdot x^3$ | 9.05105   | -0.51354 | 0.07808  | -0.00116    | 0.98363        | <0.0001 | 1715 |
|          | T <sub>comb</sub> abandoned | $y = a + b \cdot x$                             | -2.45437  | 1.14645  |          |             | 0.97405        | <0.0001 | 1363 |
|          | <i>P. gallicus</i>          |                                                 |           |          |          |             |                |         |      |
|          | T <sub>comb</sub> inhabited | $y = A + (B - A) / (1 + (x/c)^d)$               | 15.0000   | 39.84515 | 25.50334 | 5.3845      | 0.93453        | <0.0001 | 748  |
|          | T <sub>comb</sub> abandoned | $y = a + b \cdot x$                             | 0.89998   | 1.01364  |          |             | 0.93876        | <0.0001 | 116  |
| Fig. 7b  | <i>P. dominula</i>          | $y = A + B \cdot x + C \cdot x^2 + D \cdot x^3$ | 5.49294   | 0.06197  | 0.04998  | -7.40234E-4 | 0.97987        | <0.0001 | 1647 |
|          | <i>P. gallicus</i>          | $y = A + B \cdot x + C \cdot x^2 + D \cdot x^3$ | 5.0000    | 0.03831  | 0.05254  | 0.93469     | 0.93835        | <0.0001 | 748  |
| Fig. S3  | edge                        | $y = A + B \cdot x + C \cdot x^2 + D \cdot x^3$ | 11.79205  | -0.93881 | 0.09746  | -0.00142    | 0.97763        | <0.0001 | 1715 |
|          | center                      | $y = A + B \cdot x + C \cdot x^2 + D \cdot x^3$ | 7.99135   | -0.41099 | 0.07588  | -0.00116    | 0.98007        | <0.0001 | 1715 |
| Fig. S4a | head                        | $y = A + B \cdot x + C \cdot x^2 + D \cdot x^3$ | 7.54314   | -0.22048 | 0.06197  | -9.00655E-4 | 0.98208        | <0.0001 | 1643 |
| Fig. S4b | abdomen                     | $y = A + B \cdot x + C \cdot x^2 + D \cdot x^3$ | 4.96596   | 0.14465  | 0.04595  | -6.83109E-4 | 0.98598        | <0.0001 | 1647 |

**Table S3.** Multiple linear regression model and ANOVA of comb temperature ( $T_{\text{comb}}$ ) in relation to ambient air temperature at the nest ( $T_{\text{anest}}$ ), ambient air temperature of a standard meteorological weather station ( $T_{\text{astandard}}$ ), substrate temperature ( $T_{\text{substrate}}$ ), where the nest was attached to and to INCA weather data of GeoSphere Austria ( $T_{\text{aINCA}}$ ).

#### Multiple Regression Analysis

| Parameter              | Estimation | Error     | Statistics | P-value |
|------------------------|------------|-----------|------------|---------|
| Constant               | 1.28922    | 0.162866  | 7.91583    | 0       |
| $T_{\text{anest}}$     | 0.598943   | 0.016737  | 35.7856    | 0       |
| $T_{\text{astandard}}$ | 0.320195   | 0.0171942 | 18.6223    | 0       |
| $T_{\text{substrate}}$ | 0.205238   | 0.0113741 | 18.0444    | 0       |
| $T_{\text{aINCA}}$     | -0.112038  | 0.0124232 | -9.01849   | 0       |

#### ANOVA

| Source                 | Sum of Squares | Df | Mean Square | F-Ratio  | P-value |
|------------------------|----------------|----|-------------|----------|---------|
| $T_{\text{anest}}$     | 76383.1        | 1  | 76383.1     | 83997.77 | 0       |
| $T_{\text{astandard}}$ | 436.772        | 1  | 436.772     | 480.31   | 0       |
| $T_{\text{substrate}}$ | 263.519        | 1  | 263.519     | 289.79   | 0       |
| $T_{\text{aINCA}}$     | 73.9601        | 1  | 73.9601     | 81.33    | 0       |
| Model                  | 77157.4        | 4  |             |          |         |

**Table S4.** Multiple linear regression model and ANOVA of thorax temperature ( $T_{\text{thorax}}$ ) in relation to ambient air temperature at the nest ( $T_{\text{anest}}$ ), ambient air temperature of a standard meteorological weather station ( $T_{\text{astandard}}$ ), substrate temperature ( $T_{\text{substrate}}$ ), where the nest was attached to and to INCA weather data of GeoSphere Austria ( $T_{\text{aINCA}}$ ).

#### Multiple Regression Analysis

| Parameter              | Estimation | Error     | Statistics | P-value |
|------------------------|------------|-----------|------------|---------|
| Constant               | 0.702796   | 0.142562  | 4.92976    | 0       |
| $T_{\text{anest}}$     | 0.665755   | 0.0147225 | 45.2204    | 0       |
| $T_{\text{astandard}}$ | 0.215165   | 0.0152285 | 14.1291    | 0       |
| $T_{\text{substrate}}$ | 0.200059   | 0.0100039 | 19.9982    | 0       |
| $T_{\text{aINCA}}$     | -0.0474876 | 0.0110245 | -4.30745   | 0       |

#### ANOVA

| Source                 | Sum of Squares | Df | Mean Square | F-Ratio   | P-value |
|------------------------|----------------|----|-------------|-----------|---------|
| $T_{\text{anest}}$     | 75698          | 1  | 75698       | 110820.39 | 0       |
| $T_{\text{astandard}}$ | 278.07         | 1  | 278.07      | 407.09    | 0       |
| $T_{\text{substrate}}$ | 262.904        | 1  | 262.904     | 384.89    | 0       |
| $T_{\text{aINCA}}$     | 12.6737        | 1  | 12.6737     | 18.55     | 0       |
| Model                  | 76251.7        | 4  |             |           |         |

**Table S5.** Comparison of regression lines and ANOVA of comb temperature ( $T_{\text{comb}}$ ) and isothermal line ( $T_{\text{iso}}$ :  $T_{\text{comb}} = T_{\text{anest}}$ ).**Multiple Regression Analysis**

| Parameter                        | Estimation | Error      | Statistics | P-value |
|----------------------------------|------------|------------|------------|---------|
| Constant                         | -0.416386  | 0.109417   | -3.80548   | 0.0001  |
| $T_{\text{comb}}$                | 1.06503    | 0.00441911 | 241.005    | 0       |
| $T_{\text{comb}}=T_{\text{iso}}$ | 0.416386   | 0.265883   | 1.56605    | 0.1173  |
| $T_{\text{comb}}*T_{\text{iso}}$ | -0.0650281 | 0.00943133 | -6.8949    | 0       |

**Analysis of Variance**

| Source        | Sum of Squares | Df   | Mean Square | F-Ratio  | P-value |
|---------------|----------------|------|-------------|----------|---------|
| Model         | 104833         | 3    | 34944.4     | 24163.99 | 0       |
| Residuals     | 2618.95        | 1811 | 1.44613     |          |         |
| Total (Corr.) | 107452         | 1814 |             |          |         |

**Further ANOVA**

| Source            | Sum of Squares | Df | Mean Square | F-Ratio | P-value |
|-------------------|----------------|----|-------------|---------|---------|
| $T_{\text{comb}}$ | 104627         | 1  | 104627      | 72349.6 | 0       |
| Intersept         | 137.149        | 1  | 137.149     | 94.84   | 0       |
| Slope             | 68.7487        | 1  | 68.7487     | 47.54   | 0       |
| Model             | 104833         | 3  |             |         |         |

**Table S6.** Comparison of regression lines and ANOVA of thorax temperature ( $T_{\text{thorax}}$ ) and isothermal line ( $T_{\text{iso}}$ :  $T_{\text{thorax}} = T_{\text{anest}}$ ).**Multiple Regression Analysis**

| Parameter                            | Estimation | Error      | Statistics | P-value |
|--------------------------------------|------------|------------|------------|---------|
| Constant                             | -0.65469   | 0.0958867  | -6.82774   | 0       |
| $T_{\text{thorax}}$                  | 1.07913    | 0.00387947 | 278.165    | 0       |
| $T_{\text{thorax}}=T_{\text{iso}}$   | 0.65469    | 0.22956    | 2.85194    | 0.0043  |
| $T_{\text{thorax}} * T_{\text{iso}}$ | -0.0791322 | 0.00815355 | -9.70524   | 0       |

**Analysis of Variance**

| Source        | Sum of Squares | Df   | Mean Square | F-Ratio  | P-value |
|---------------|----------------|------|-------------|----------|---------|
| Model         | 103732         | 3    | 34577.3     | 32274.34 | 0       |
| Residuals     | 1867.37        | 1743 | 1.07135     |          |         |
| Total (Corr.) | 105599         | 1746 |             |          |         |

**Further ANOVA**

| Source              | Sum of Squares | Df | Mean Square | F-Ratio | P-value |
|---------------------|----------------|----|-------------|---------|---------|
| $T_{\text{thorax}}$ | 103467         | 1  | 103467      | 96576.3 | 0       |
| Intersept           | 163.402        | 1  | 163.402     | 152.52  | 0       |
| Slope               | 100.913        | 1  | 100.913     | 94.19   | 0       |
| Model               | 103732         | 3  |             |         |         |

**Table S7.** Comparison of regression lines and ANOVA of abandoned comb temperature ( $T_{\text{comb}}$ ) and isothermal line ( $T_{\text{iso}}$ ;  $T_{\text{comb}} = T_{\text{anest}}$ ).**Multiple Regression Analysis**

| Parameter                        | Estimation | Error      | Statistics | P-value |
|----------------------------------|------------|------------|------------|---------|
| Constant                         | -2.32416   | 0.106884   | -21.7447   | 0       |
| $T_{\text{comb}}$                | 1.14046    | 0.00453095 | 251.705    | 0       |
| $T_{\text{comb}}=T_{\text{iso}}$ | 2.32416    | 0.243795   | 9.53325    | 0       |
| $T_{\text{comb}}*T_{\text{iso}}$ | -0.140462  | 0.00879144 | -15.9771   | 0       |

**Analysis of Variance**

| Source        | Sum of Squares | Df   | Mean Square | F-Ratio  | P-value |
|---------------|----------------|------|-------------|----------|---------|
| Model         | 95983.7        | 3    | 31994.6     | 27059.47 | 0       |
| Residuals     | 1902.45        | 1609 | 1.18238     |          |         |
| Total (Corr.) | 97886.2        | 1612 |             |          |         |

**Further ANOVA**

| Source            | Sum of Squares | Df | Mean Square | F-Ratio  | P-value |
|-------------------|----------------|----|-------------|----------|---------|
| $T_{\text{comb}}$ | 95563          | 1  | 95563       | 80822.59 | 0       |
| Intersept         | 118.881        | 1  | 118.881     | 100.54   | 0       |
| Slope             | 301.824        | 1  | 301.824     | 255.27   | 0       |
| Model             | 95983.7        | 3  |             |          |         |

**Table S8.** Comparison of regression lines and ANOVA of comb temperature ( $T_{\text{comb}}$ ) of *P. dominula* and *P. gallicus*.**Multiple Regression Analysis**

| Parameter                   | Estimation | Error      | Statistics | P-value |
|-----------------------------|------------|------------|------------|---------|
| Constant                    | -0.416386  | 0.13463    | -3.0928    | 0.002   |
| $T_{\text{comb}}$           | 1.06503    | 0.00543741 | 195.871    | 0       |
| P.dom.=P.gal.               | 9.00046    | 0.306846   | 29.3322    | 0       |
| $T_{\text{comb}}$ * Species | -0.31289   | 0.0102387  | -30.5595   | 0       |

**Analysis of Variance**

| Source        | Sum of Squares | Df   | Mean Square | F-Ratio  | P-value |
|---------------|----------------|------|-------------|----------|---------|
| Model         | 126091         | 3    | 42030.4     | 19197.36 | 0       |
| Residuals     | 5383.69        | 2459 | 2.18938     |          |         |
| Total (Corr.) | 131475         | 2462 |             |          |         |

**Further ANOVA**

| Source            | Sum of Squares | Df | Mean Square | F-Ratio  | P-value |
|-------------------|----------------|----|-------------|----------|---------|
| $T_{\text{comb}}$ | 124042         | 1  | 124042      | 56656.03 | 0       |
| Intersept         | 4.71652        | 1  | 4.71652     | 2.15     | 0.1422  |
| Slope             | 2044.63        | 1  | 2044.63     | 933.88   | 0       |
| Model             | 126091         | 3  |             |          |         |



**Table S9.** Comparison of regression lines and ANOVA of thorax temperature ( $T_{\text{thorax}}$ ) of *P. dominula* and *P. gallicus*.**Multiple Regression Analysis**

| Parameter                     | Estimation | Error      | Statistics | P-value |
|-------------------------------|------------|------------|------------|---------|
| Constant                      | -0.65469   | 0.123319   | -5.3089    | 0       |
| $T_{\text{thorax}}$           | 1.07913    | 0.00498936 | 216.287    | 0       |
| P.dom.=P.gal.                 | 4.45491    | 0.277028   | 16.0811    | 0       |
| $T_{\text{thorax}}$ * Species | -0.153125  | 0.00926354 | -16.5298   | 0       |

**Analysis of Variance**

| Source        | Sum of Squares | Df   | Mean Square | F-Ratio  | P-value |
|---------------|----------------|------|-------------|----------|---------|
| Model         | 137569         | 3    | 45856.3     | 25877.36 | 0       |
| Residuals     | 4237           | 2391 | 1.77206     |          |         |
| Total (Corr.) | 141806         | 2394 |             |          |         |

**Further ANOVA**

| Source              | Sum of Squares | Df | Mean Square | F-Ratio  | P-value |
|---------------------|----------------|----|-------------|----------|---------|
| $T_{\text{thorax}}$ | 137085         | 1  | 137085      | 77358.83 | 0       |
| Intersept           | 0.03112        | 1  | 0.03112     | 0.02     | 0.8946  |
| Slope               | 484.19         | 1  | 484.19      | 273.24   | 0       |
| Model               | 137569         | 3  |             |          |         |

**Table S10.** Comparison of regression lines and ANOVA of abandoned comb temperature ( $T_{\text{comb}}$ ) of *P. dominula* and *P. gallicus*.**Multiple Regression Analysis**

| Parameter                   | Estimation | Error     | Statistics | P-value |
|-----------------------------|------------|-----------|------------|---------|
| Constant                    | -2.32416   | 0.109475  | -21.23     | 0       |
| $T_{\text{comb}}$           | 1.14046    | 0.0046408 | 245.747    | 0       |
| P.dom.=P.gal.               | 3.24342    | 0.760752  | 4.26344    | 0       |
| $T_{\text{comb}}$ * Species | -0.127455  | 0.0272722 | -4.67342   | 0       |

**Analysis of Variance**

| Source        | Sum of Squares | Df   | Mean Square | F-Ratio | P-value |
|---------------|----------------|------|-------------|---------|---------|
| Model         | 79796.8        | 3    | 26598.9     | 21443.7 | 0       |
| Residuals     | 2015.66        | 1625 | 1.24041     |         |         |
| Total (Corr.) | 81812.5        | 1628 |             |         |         |

**Further ANOVA**

| Source            | Sum of Squares | Df | Mean Square | F-Ratio  | P-value |
|-------------------|----------------|----|-------------|----------|---------|
| $T_{\text{comb}}$ | 79761.9        | 1  | 79761.9     | 64302.97 | 0       |
| Intersept         | 7.78222        | 1  | 7.78222     | 6.27     | 0.0123  |
| Slope             | 27.0915        | 1  | 27.0915     | 21.84    | 0       |
| Model             | 79796.8        | 3  |             |          |         |

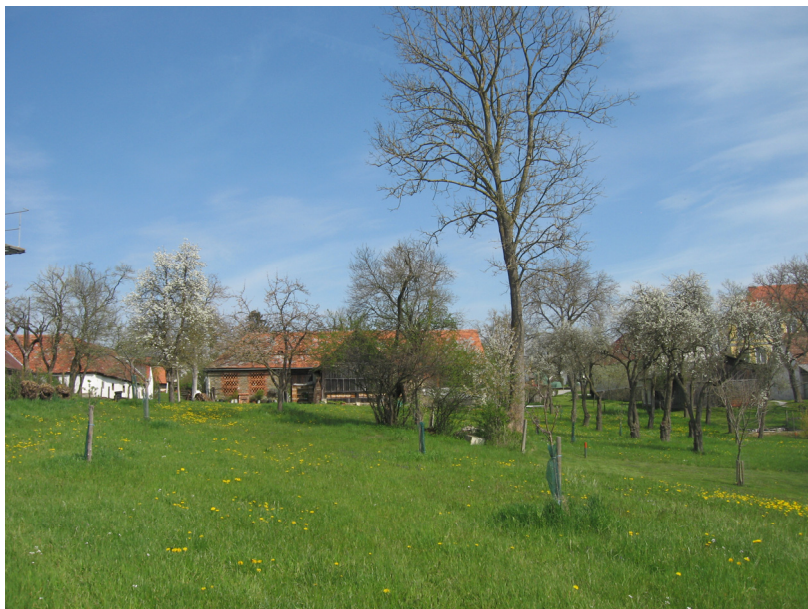

**Figure S1.** Typical habitat of the paper wasp *Polistes dominula* and research location in a rural area in Gschwendt (Styria, Austria) in a temperate climate region of Central Europe.

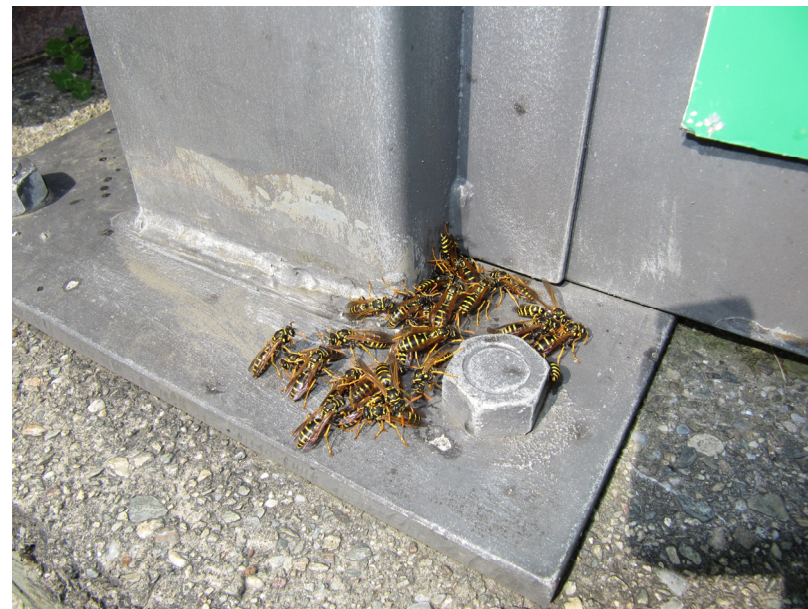

**Figure S2.** Man-made breeding location of the paper wasp *Polistes dominula* at 1160 m ASL in an Alpine climate region in Obergail (Lesachtal, Carinthia, Austria), 16 Sept. 2019.

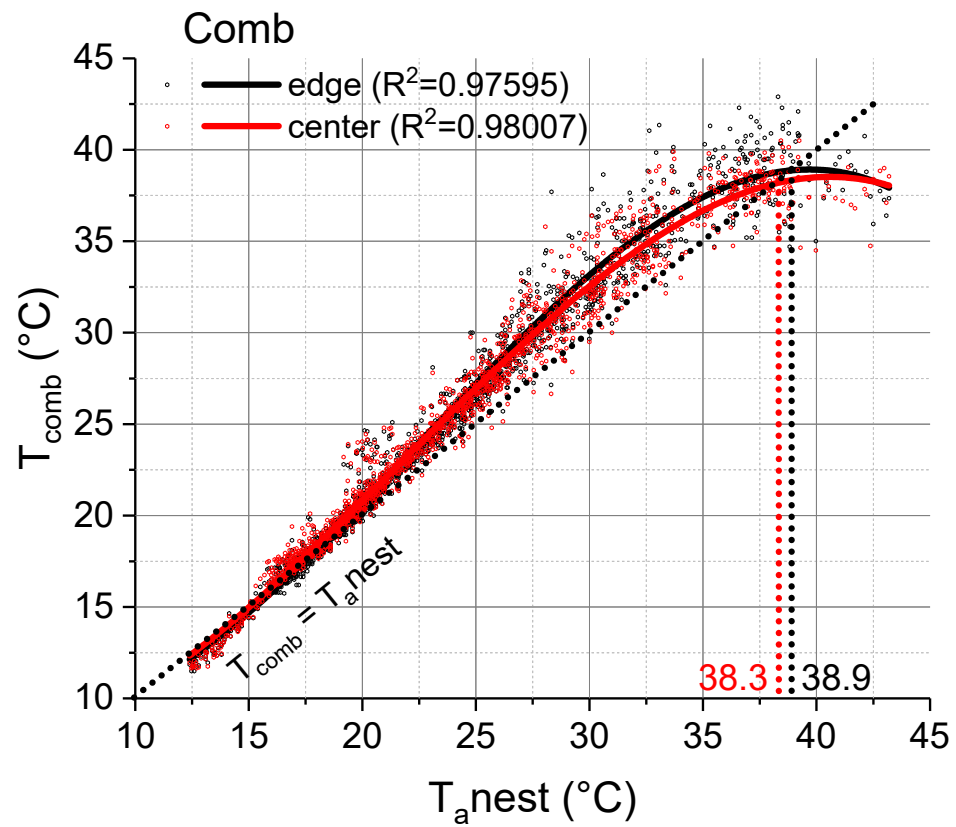

**Figure S3.** Comb temperature ( $T_{\text{comb}}$ ) in relation to ambient nest temperature ( $T_{a\text{ nest}}$ ). Temperature curves from cells the edge and in the center of the comb, points of intersection with isothermal line (dotted line indicates a slope of 1,  $T_{\text{comb}} = T_{a\text{ nest}}$ ) are indicated by vertical dotted line.

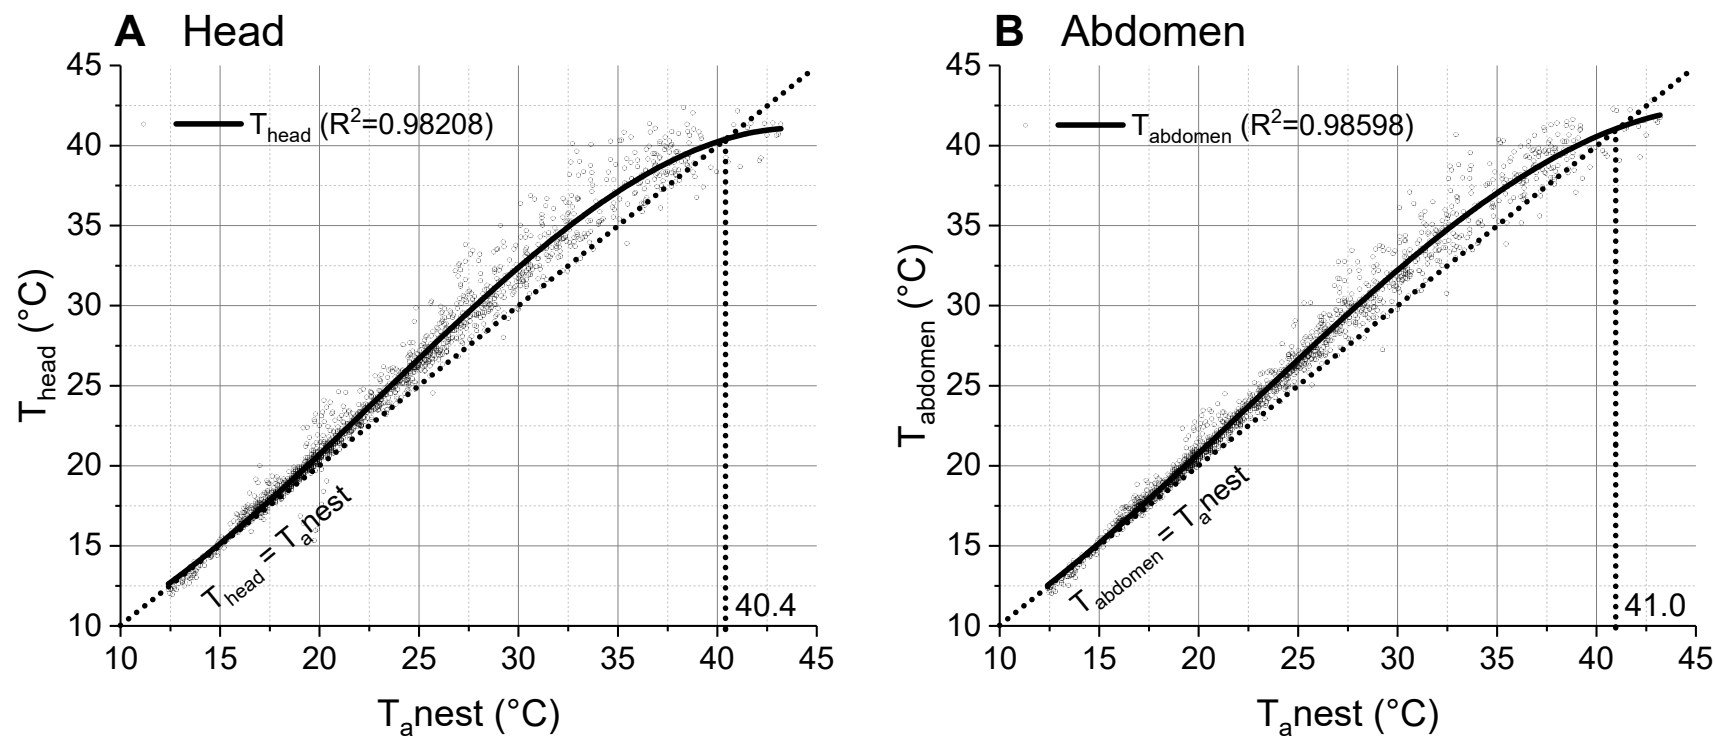

**Figure S4.** Body temperature in relation to ambient nest temperature ( $T_{\text{a nest}}$ ): (A) Head ( $T_{\text{head}}$ ) and (B) abdomen ( $T_{\text{abdomen}}$ ) temperature of wasps from inhabited nests, point of intersection with isothermal line ( $T_{\text{head/abdomen}} = T_{\text{a nest}}$ ) is indicated by vertical dotted line.
